# Supplementary material for: Coverage-dependent adsorption and dissociation of H2O on Al surfaces
Source: Royal Society of Chemistry journal article supplement (doi:10.1039/d2cp04386f), 2023-01-01
Supplement: d2cp04386f1.pdf [file d2cp04386f1.pdf]

## Coverage-dependent adsorption, dissociation of H<sub>2</sub>O on Al surfaces

### Supporting Information Table of Contents

|                                                                                                                         |     |
|-------------------------------------------------------------------------------------------------------------------------|-----|
| Figure S1. H <sub>2</sub> O adsorption energy over Al surfaces and ANPs.....                                            | S3  |
| Figure S2. Adsorption configuration on eight H <sub>2</sub> O on Al(111) .....                                          | S4  |
| Table S1. Energetics and structures of IS, TS and FS during the H <sub>2</sub> O dissociation on Al <sub>34</sub> ..... | S5  |
| Table S2. Energetics and structures of IS, TS and FS during the H <sub>2</sub> O dissociation on Al <sub>48</sub> ..... | S6  |
| Table S3. Energetics and structures of IS, TS and FS during the H <sub>2</sub> O dissociation on Al <sub>64</sub> ..... | S7  |
| Table S4. Energetics and structures of IS, TS and FS during the H <sub>2</sub> O dissociation on Al <sub>92</sub> ..... | S8  |
| Table S5. Energetics and structures of IS, TS and FS during the H <sub>2</sub> O dissociation on Al(111) .....          | S9  |
| Table S6. Energetics and structures of IS, TS and FS during the H <sub>2</sub> O dissociation on Al(110) .....          | S10 |
| Table S7. Energetics and structures of IS, TS and FS during the H <sub>2</sub> O dissociation on Al(100) .....          | S11 |

|                                                                                                                             |     |
|-----------------------------------------------------------------------------------------------------------------------------|-----|
| Table S8. Structures of IS, TS and FS during the (H <sub>2</sub> O) <sub>2</sub> dissociation on Al(110)...                 | S12 |
| Table S9. Structures of IS, TS and FS during the (H <sub>2</sub> O) <sub>3</sub> dissociation on Al(111)...                 | S13 |
| Table S10. Structures of IS, TS and FS during the (H <sub>2</sub> O) <sub>3</sub> dissociation on Al(110).                  | S14 |
| Table S11. Structures of IS, TS and FS during the (H <sub>2</sub> O) <sub>2</sub> dissociation on<br>Al <sub>34</sub> ..... | S15 |
| Table S12. Structures of IS, TS and FS during the (H <sub>2</sub> O) <sub>2</sub> dissociation on<br>Al <sub>48</sub> ..... | S16 |
| Table S13. Structures of IS, TS and FS during the (H <sub>2</sub> O) <sub>2</sub> dissociation on<br>Al <sub>64</sub> ..... | S17 |
| Cartesian coordinates of ANPs.....                                                                                          | S18 |

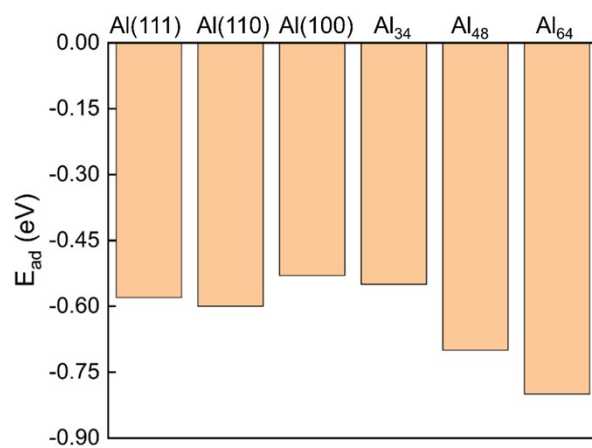

Figure S1. H<sub>2</sub>O adsorption energy over Al surfaces and ANPs.

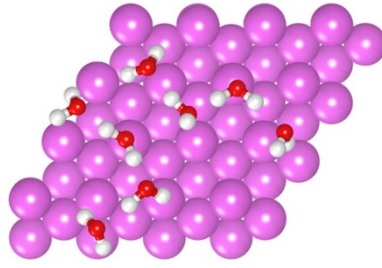

Figure S2. Adsorption configuration on eight H<sub>2</sub>O molecules on Al(111).

**Table S1. Energetics and structures of IS, TS and FS during the H<sub>2</sub>O dissociation on Al<sub>34</sub>.**

|                 |      | 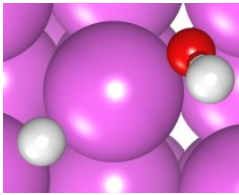 |  |  |
|-----------------|------|-----------------------------------------------------------------------------------|------------------------------------------------------------------------------------|-------------------------------------------------------------------------------------|
|                 |      | IS                                                                                | TS                                                                                 | FS                                                                                  |
| E (eV)          |      | 0.00                                                                              | 1.03                                                                               | -0.12                                                                               |
| Distance<br>(Å) | H-O  | 0.98                                                                              | 0.99, 1.40                                                                         | 0.97                                                                                |
|                 | Al-O | 2.17                                                                              | 2.08                                                                               | 1.86, 2.00                                                                          |
|                 | Al-H | 2.68                                                                              | 2.46, 2.60                                                                         | 1.72, 1.97                                                                          |

**Table S2. Energetics and structures of IS, TS and FS during the H<sub>2</sub>O dissociation on Al<sub>48</sub>.**

|              |      | IS   | TS         | FS         |
|--------------|------|------|------------|------------|
| E (eV)       |      | 0.00 | 0.90       | -0.43      |
| Distance (Å) | H-O  | 0.98 | 0.98, 1.41 | 0.97       |
|              | Al-O | 2.14 | 2.07       | 1.96       |
|              | Al-H | -    | 2.37       | 1.70, 1.95 |

**Table S3. Energetics and structures of IS, TS and FS during the H<sub>2</sub>O dissociation on Al<sub>64</sub>.**

|              |      | 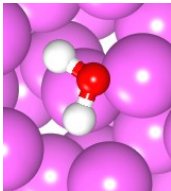 |  |  |
|--------------|------|-----------------------------------------------------------------------------------|------------------------------------------------------------------------------------|-------------------------------------------------------------------------------------|
|              |      | IS                                                                                | TS                                                                                 | FS                                                                                  |
| E (eV)       |      | 0.00                                                                              | 0.81                                                                               | -0.40                                                                               |
| Distance (Å) | H-O  | 0.99                                                                              | 0.99, 1.37                                                                         | 0.99                                                                                |
|              | Al-O | 2.10                                                                              | 2.48                                                                               | 1.89, 1.95                                                                          |
|              | Al-H | -                                                                                 | -                                                                                  | 1.71, 1.87                                                                          |

**Table S4. Energetics and structures of IS, TS and FS during the H<sub>2</sub>O dissociation on Al<sub>2</sub>O<sub>3</sub>.**

|              |      | IS   | TS         | FS    |
|--------------|------|------|------------|-------|
| E (eV)       |      | 0.00 | 0.53       | -0.44 |
| Distance (Å) | H-O  | 0.99 | 0.98, 1.45 | 0.97  |
|              | Al-O | 2.08 | 1.86       | 1.75  |
|              | Al-H | -    | -          | 1.70  |

**Table S5. Energetics and structures of IS, TS and FS during the H<sub>2</sub>O dissociation on Al(111).**



|              |      | 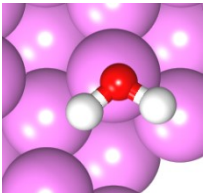 |  |  |
|--------------|------|-----------------------------------------------------------------------------------|------------------------------------------------------------------------------------|-------------------------------------------------------------------------------------|
|              |      | IS                                                                                | TS                                                                                 | FS                                                                                  |
| E (eV)       |      | 0.00                                                                              | 0.85                                                                               | -1.29                                                                               |
| Distance (Å) | H-O  | 0.98                                                                              | 0.99, 1.43                                                                         | 0.97                                                                                |
|              | Al-O | 2.18                                                                              | 1.91                                                                               | 2.31                                                                                |
|              | Al-H | -                                                                                 | 2.04, 2.04, 2.62                                                                   | 2.15                                                                                |

**Table S6. Energetics and structures of IS, TS and FS during the H<sub>2</sub>O dissociation on Al(110).**

|              |      | 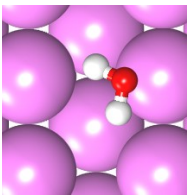 |  |  |
|--------------|------|-----------------------------------------------------------------------------------|------------------------------------------------------------------------------------|-------------------------------------------------------------------------------------|
|              |      | IS                                                                                | TS                                                                                 | FS                                                                                  |
| E (eV)       |      | 0.00                                                                              | 0.58                                                                               | -0.75                                                                               |
| Distance (Å) | H-O  | 0.98                                                                              | 0.98, 1.57                                                                         | 0.98                                                                                |
|              | Al-O | 2.44                                                                              | 2.25                                                                               | 1.96                                                                                |
|              | Al-H | -                                                                                 | 1.98, 2.69, 2.81                                                                   | 1.87                                                                                |

**Table S7. Energetics and structures of IS, TS and FS during the H<sub>2</sub>O dissociation on Al(100).**

|              |      | 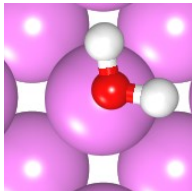 |  |  |
|--------------|------|-----------------------------------------------------------------------------------|------------------------------------------------------------------------------------|-------------------------------------------------------------------------------------|
|              |      | IS                                                                                | TS                                                                                 | FS                                                                                  |
| E (eV)       |      | 0.00                                                                              | 0.67                                                                               | -0.81                                                                               |
|              | H-O  | 0.98                                                                              | 0.98, 1.53                                                                         | 0.98                                                                                |
| Distance (Å) | Al-O | 2.18                                                                              | 2.06                                                                               | 1.91, 1.93                                                                          |
|              | Al-H | -                                                                                 | 2.32, 2.61, 2.66                                                                   | 1.75, 1.82                                                                          |

**Table S8. Energetics and structures of IS, TS and FS during the (H<sub>2</sub>O)<sub>2</sub> dissociation on Al(110).**

|              |                                 | 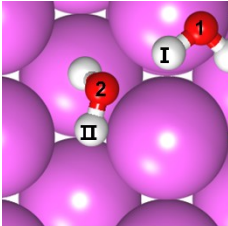 |  |  |
|--------------|---------------------------------|-----------------------------------------------------------------------------------|------------------------------------------------------------------------------------|-------------------------------------------------------------------------------------|
|              |                                 | IS                                                                                | TS                                                                                 | FS                                                                                  |
| E (eV)       |                                 | 0.00                                                                              | 0.36                                                                               | -0.52                                                                               |
| Distance (Å) | H <sub>I</sub> -O <sub>1</sub>  | 1.00                                                                              | 1.63                                                                               | 1.20                                                                                |
|              | H <sub>I</sub> -O <sub>2</sub>  | 1.75                                                                              | 1.00                                                                               | 1.21                                                                                |
|              | H <sub>II</sub> -O <sub>2</sub> | 0.97                                                                              | 1.59                                                                               | -                                                                                   |
|              | Al-O <sub>1</sub>               | 2.40                                                                              | 1.80                                                                               | 2.26                                                                                |
|              | Al-O <sub>2</sub>               | -                                                                                 | -                                                                                  | -                                                                                   |
|              | Al-H <sub>II</sub>              | -                                                                                 | 1.81, 2.40, 2.70                                                                   | 2.08, 2.09                                                                          |

**Table S9. Energetics and structures of IS, TS and FS during the (H<sub>2</sub>O)<sub>3</sub> dissociation on Al(111).**

|              |                                 | 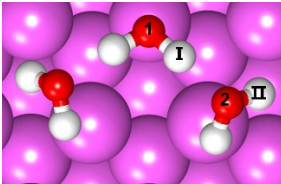 |  |  |
|--------------|---------------------------------|-----------------------------------------------------------------------------------|------------------------------------------------------------------------------------|-------------------------------------------------------------------------------------|
|              |                                 | IS                                                                                | TS                                                                                 | FS                                                                                  |
| E (eV)       |                                 | 0.00                                                                              | 0.64                                                                               | -0.23                                                                               |
| Distance (Å) | H <sub>I</sub> -O <sub>1</sub>  | 1.01                                                                              | 1.02                                                                               | 1.18                                                                                |
|              | H <sub>I</sub> -O <sub>2</sub>  | 1.67                                                                              | 1.63                                                                               | 1.23                                                                                |
|              | H <sub>II</sub> -O <sub>2</sub> | 0.98                                                                              | 1.34                                                                               | -                                                                                   |
|              | Al-O <sub>1</sub>               | 1.97                                                                              | 2.00                                                                               | 1.88                                                                                |
|              | Al-O <sub>2</sub>               | -                                                                                 | 2.06                                                                               | 1.91                                                                                |
|              | Al-H <sub>II</sub>              | 2.99                                                                              | 2.18, 2.62                                                                         | 1.85, 2.08                                                                          |

**Table S10. Energetics and structures of IS, TS and FS during the (H<sub>2</sub>O)<sub>3</sub> dissociation on Al(110).**

|              |                                 | 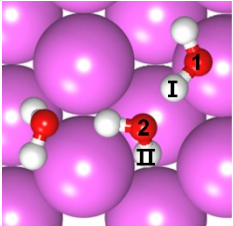 |  |  |
|--------------|---------------------------------|-----------------------------------------------------------------------------------|------------------------------------------------------------------------------------|-------------------------------------------------------------------------------------|
|              |                                 | IS                                                                                | TS                                                                                 | FS                                                                                  |
| E (eV)       |                                 | 0.00                                                                              | 0.26                                                                               | -0.38                                                                               |
| Distance (Å) | H <sub>I</sub> -O <sub>1</sub>  | 1.05                                                                              | 1.68                                                                               | 1.20                                                                                |
|              | H <sub>I</sub> -O <sub>2</sub>  | 1.51                                                                              | 1.01                                                                               | 1.27                                                                                |
|              | H <sub>II</sub> -O <sub>2</sub> | 0.98                                                                              | 1.62                                                                               | -                                                                                   |
|              | Al-O <sub>1</sub>               | 2.94                                                                              | 1.85                                                                               | 2.19                                                                                |
|              | Al-O <sub>2</sub>               | -                                                                                 | -                                                                                  | 2.89                                                                                |
|              | Al-H <sub>II</sub>              | 2.91                                                                              | 1.81, 2.45                                                                         | 1.66, 2.27, 2.27                                                                    |

**Table S11. Energetics and structures of IS, TS and FS during the (H<sub>2</sub>O)<sub>2</sub> dissociation on Al<sub>34</sub>.**

|        |                                                                                   |                                                                                    |                                                                                     |
|--------|-----------------------------------------------------------------------------------|------------------------------------------------------------------------------------|-------------------------------------------------------------------------------------|
|        | 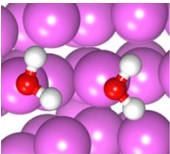 |  |  |
|        | IS                                                                                | TS                                                                                 | FS                                                                                  |
| E (eV) | 0.00                                                                              | 0.84                                                                               | -0.86                                                                               |

**Table S12. Energetics and structures of IS, TS and FS during the  $(\text{H}_2\text{O})_2$  dissociation on  $\text{Al}_{48}$ .**

|              |                                 | 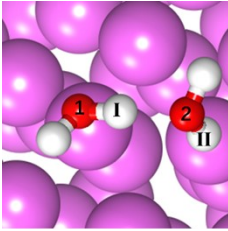 |  |  |
|--------------|---------------------------------|-----------------------------------------------------------------------------------|------------------------------------------------------------------------------------|-------------------------------------------------------------------------------------|
|              |                                 | IS                                                                                | TS                                                                                 | FS                                                                                  |
| E (eV)       |                                 | 0.00                                                                              | 0.74                                                                               | -0.50                                                                               |
| Distance (Å) | H <sub>I</sub> -O <sub>1</sub>  | 1.03                                                                              | 1.51                                                                               | 1.67                                                                                |
|              | H <sub>I</sub> -O <sub>2</sub>  | 1.58                                                                              | 1.08                                                                               | 1.02                                                                                |
|              | H <sub>II</sub> -O <sub>2</sub> | 0.99                                                                              | 1.54                                                                               | -                                                                                   |
|              | Al-O <sub>1</sub>               | 2.01                                                                              | 1.79                                                                               | 1.79                                                                                |
|              | Al-O <sub>2</sub>               | -                                                                                 | -                                                                                  | -                                                                                   |
|              | Al-H <sub>II</sub>              | -                                                                                 | 1.79                                                                               | 1.71, 1.84                                                                          |

**Table S13. Energetics and structures of IS, TS and FS during the (H<sub>2</sub>O)<sub>2</sub> dissociation on Al<sub>64</sub>.**



|              |                                 | 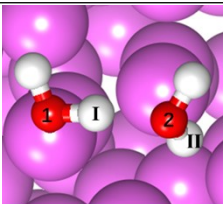 |  |  |
|--------------|---------------------------------|-----------------------------------------------------------------------------------|------------------------------------------------------------------------------------|-------------------------------------------------------------------------------------|
|              |                                 | IS                                                                                | TS                                                                                 | FS                                                                                  |
| E (eV)       |                                 | 0.00                                                                              | 0.71                                                                               | -0.41                                                                               |
| Distance (Å) | H <sub>I</sub> -O <sub>1</sub>  | 1.03                                                                              | 1.51                                                                               | 1.88                                                                                |
|              | H <sub>I</sub> -O <sub>2</sub>  | 1.59                                                                              | 1.01                                                                               | 1.98                                                                                |
|              | H <sub>II</sub> -O <sub>2</sub> | 0.99                                                                              | 1.37                                                                               | -                                                                                   |
|              | Al-O <sub>1</sub>               | 2.00                                                                              | 1.83                                                                               | 1.77                                                                                |
|              | Al-O <sub>2</sub>               | -                                                                                 | -                                                                                  | -                                                                                   |
|              | Al-H <sub>II</sub>              | -                                                                                 | -                                                                                  | 1.77, 1.79                                                                          |

Coordinates of ANPs

Al<sub>34</sub>

|        |                  |        |
|--------|------------------|--------|
| -3.818 | -0.022           | 1.654  |
| 1.926  | -1.447           | 4.079  |
| 2.061  | 0.965            | -4.139 |
| -1.984 | -2.123           | 1.185  |
| -0.609 | 1.337            | -4.270 |
| 3.026  | -0.379           | 0.045  |
| 0.176  | -1.771           | -3.506 |
| 1.488  | 4.316            | 0.462  |
| 2.625  | -1.127           | -2.509 |
| -3.909 | -1.405           | -0.700 |
| 2.755  | 0.553            | 2.539  |
| 0.302  | -0.602           | 1.881  |
| -4.124 | 1.032            | -1.761 |
| -0.196 | -2.972           | 3.225  |
| 0.250  | 0.716            | 4.317  |
| 0.442  | 0.553            | -2.023 |
| 2.393  | -2.426           | 1.650  |
| -1.935 | -0.825           | 3.555  |
| 0.790  | 3.301            | -1.989 |
| -1.723 | 2.362            | -1.951 |
| 0.809  | 2.830            | 2.673  |
| -2.072 | -0.485           | -2.795 |
| -1.643 | 0.249            | -0.164 |
| 0.451  | -4.078           | -2.046 |
| -1.074 | 3.575            | 0.567  |
| 2.966  | 1.694            | -1.682 |
| 3.440  | 2.483            | 0.864  |
| -1.532 | 1.520            | 2.266  |
| 0.466  | -1.622           | -0.624 |
| 2.730  | -3.255           | -0.839 |
| -3.437 | 2.388            | 0.428  |
| -1.880 | -2.969           | -1.381 |
| -0.015 | -3.916           | 0.663  |
| 0.856  | 1.550            | 0.327  |
|        | Al <sub>48</sub> |        |
| -4.601 | 0.053            | -0.461 |
| -1.029 | 1.799            | 3.926  |
| 1.602  | 1.929            | 3.064  |
| -0.056 | -2.694           | 3.461  |
| -0.449 | -3.104           | -4.254 |
| -1.923 | -4.512           | 0.026  |
| 1.709  | 1.456            | 0.229  |
| -2.848 | 4.081            | 2.434  |
| 3.141  | -1.233           | 3.689  |

|        |                  |        |
|--------|------------------|--------|
| -0.145 | 4.205            | 3.327  |
| -1.262 | -0.237           | 1.664  |
| 1.641  | 3.989            | 1.274  |
| 0.687  | -0.554           | -4.559 |
| 2.553  | -3.714           | -0.527 |
| 1.407  | -0.674           | 1.789  |
| -3.667 | 1.980            | -2.388 |
| -2.187 | -0.790           | 4.198  |
| 1.389  | 2.123            | -4.314 |
| -3.525 | -1.009           | -2.693 |
| 1.783  | -1.036           | -0.821 |
| 2.201  | -3.407           | 2.251  |
| 4.404  | 0.520            | -0.754 |
| -0.809 | 2.483            | 1.203  |
| -2.081 | 3.839            | -0.943 |
| -0.643 | -1.457           | -2.084 |
| 0.202  | -4.153           | -1.786 |
| 0.612  | -0.251           | 4.391  |
| -3.352 | 1.373            | 2.791  |
| 4.248  | -2.044           | -1.795 |
| 0.648  | 3.715            | -1.240 |
| -1.068 | 2.874            | -3.208 |
| -1.788 | 0.777            | -0.786 |
| -2.371 | -3.140           | 2.280  |
| -0.060 | -2.559           | 0.561  |
| 0.649  | -5.188           | 0.736  |
| 1.972  | -2.611           | -3.127 |
| 4.040  | -1.751           | 0.987  |
| 3.940  | 2.930            | 0.363  |
| 3.092  | 0.037            | -3.287 |
| 3.005  | 2.515            | -2.117 |
| -3.822 | 2.435            | 0.399  |
| -2.474 | -3.468           | -2.432 |
| 0.556  | 0.946            | -2.113 |
| -2.689 | -1.855           | -0.182 |
| -1.739 | 0.397            | -4.016 |
| -0.753 | 5.247            | 0.834  |
| -4.048 | -1.057           | 2.028  |
| 3.904  | 0.794            | 1.982  |
|        | Al <sub>64</sub> |        |
| 0.337  | -0.395           | 4.370  |
| 1.362  | -4.027           | -3.058 |
| -0.301 | -2.598           | -4.759 |
| -3.662 | -3.188           | -1.554 |

|        |        |        |
|--------|--------|--------|
| -0.463 | 5.057  | -2.368 |
| 3.571  | 0.140  | 4.158  |
| -1.394 | -4.016 | -2.694 |
| -5.190 | 0.635  | 0.759  |
| -3.346 | -3.353 | 1.671  |
| -1.645 | 0.066  | 2.363  |
| 3.557  | -2.738 | -2.264 |
| -5.318 | -2.040 | 0.326  |
| 1.714  | 2.039  | 3.930  |
| 2.912  | -4.912 | -0.647 |
| 3.692  | 2.475  | -2.467 |
| 0.005  | 2.202  | 1.699  |
| 2.533  | 4.009  | 2.155  |
| 4.294  | 3.732  | 0.043  |
| -2.373 | 1.784  | 0.372  |
| 4.182  | 1.948  | 2.240  |
| -2.545 | -1.569 | -3.572 |
| -1.064 | 1.989  | 4.362  |
| 0.102  | -1.552 | -2.230 |
| 1.491  | -2.669 | -0.127 |
| 0.145  | -1.950 | 2.097  |
| 1.761  | -4.447 | 2.069  |
| -0.257 | 2.742  | -1.037 |
| 0.494  | 4.953  | 0.667  |
| -1.721 | 0.616  | -2.005 |
| 0.188  | 4.303  | 3.504  |
| -3.457 | 1.088  | -3.984 |
| -2.864 | 3.547  | -2.233 |
| 5.416  | -1.452 | -0.809 |
| -1.153 | -2.774 | -0.123 |
| -2.050 | -2.375 | 3.873  |
| -0.197 | 0.107  | -4.588 |
| 4.734  | -0.647 | 1.789  |
| -2.276 | 3.847  | 2.552  |
| -0.121 | -0.141 | 0.077  |
| 2.119  | -1.508 | -4.196 |
| -2.067 | 4.830  | 0.006  |
| -2.879 | -0.833 | 0.025  |
| 2.176  | 4.558  | -1.440 |
| -4.280 | -1.034 | 2.772  |
| -4.718 | -0.765 | -2.113 |
| 0.256  | -5.147 | -0.724 |
| -2.819 | 0.055  | 4.840  |
| -4.457 | 3.446  | 0.709  |

|        |                  |        |
|--------|------------------|--------|
| -4.701 | 1.836            | -1.580 |
| 5.072  | 1.159            | -0.362 |
| -2.330 | -5.207           | -0.138 |
| -1.098 | 2.561            | -3.982 |
| 0.444  | -3.226           | 4.452  |
| 4.285  | -0.143           | -2.988 |
| 2.494  | 1.162            | -4.711 |
| 2.797  | -0.490           | -0.639 |
| 2.740  | -2.250           | 3.357  |
| 2.136  | 2.044            | 0.023  |
| -0.971 | -4.535           | 2.280  |
| 1.233  | 0.943            | -2.329 |
| 1.432  | 3.392            | -3.753 |
| -3.886 | 1.752            | 2.972  |
| 4.008  | -3.116           | 1.057  |
| 1.923  | 0.084            | 1.905  |
|        | Al <sub>92</sub> |        |
| -0.284 | -0.033           | 0.006  |
| 0.532  | 1.633            | 2.119  |
| 2.258  | -0.638           | 2.111  |
| 2.074  | 1.561            | -0.072 |
| -3.683 | -6.191           | -5.941 |
| -0.152 | -6.210           | -5.795 |
| -5.631 | -4.125           | -6.198 |
| -3.367 | -4.188           | -7.931 |
| -3.916 | -1.950           | -6.211 |
| -1.944 | -4.055           | -5.690 |
| -1.951 | -1.761           | -8.177 |
| -0.480 | -4.234           | -7.912 |
| 0.038  | -1.986           | -6.244 |
| 1.770  | -4.197           | -6.179 |
| -5.852 | 0.080            | -6.179 |
| -3.666 | 0.384            | -7.886 |
| -3.967 | 2.183            | -5.847 |
| -2.031 | 0.146            | -5.760 |
| -0.334 | 0.428            | -7.828 |
| -0.088 | 2.205            | -5.739 |
| 1.900  | 0.110            | -6.185 |
| -5.977 | -6.016           | -4.077 |
| -4.137 | -7.969           | -3.900 |
| -4.218 | -5.957           | -1.950 |
| -2.456 | -8.188           | -1.800 |
| -1.993 | -6.161           | -3.786 |
| 0.018  | -8.048           | -3.248 |

|        |        |        |
|--------|--------|--------|
| 0.071  | -5.783 | -1.881 |
| 1.963  | -6.138 | -3.881 |
| -7.747 | -4.054 | -4.460 |
| -8.124 | -2.106 | -2.622 |
| -6.076 | -3.967 | -2.172 |
| -5.890 | -2.032 | -4.340 |
| -3.972 | -4.043 | -3.971 |
| -4.014 | -2.004 | -2.214 |
| -2.046 | -4.046 | -1.984 |
| -1.999 | -1.977 | -4.056 |
| 0.064  | -4.004 | -3.973 |
| -0.055 | -2.036 | -2.184 |
| 2.098  | -3.994 | -2.073 |
| 1.980  | -2.055 | -4.364 |
| 3.782  | -4.156 | -4.288 |
| 4.152  | -2.073 | -2.579 |
| -7.857 | -0.064 | -4.347 |
| -6.158 | -0.093 | -2.113 |
| -6.112 | 1.963  | -3.938 |
| -4.083 | -0.009 | -4.026 |
| -4.199 | 1.802  | -1.934 |
| -2.095 | -0.032 | -2.059 |
| -2.088 | 2.129  | -3.847 |
| 0.061  | -0.124 | -4.110 |
| 0.032  | 1.610  | -2.037 |
| 2.099  | -0.175 | -2.207 |
| 2.055  | 1.943  | -3.936 |
| 3.883  | -0.036 | -4.350 |
| -4.251 | 3.919  | -3.702 |
| -2.344 | 3.999  | -1.782 |
| 0.078  | 3.882  | -3.441 |
| -6.215 | -5.602 | 0.077  |
| -4.439 | -7.784 | 0.086  |
| -4.253 | -5.860 | 2.012  |
| -2.159 | -6.126 | 0.063  |
| -0.045 | -7.948 | -0.301 |
| 0.049  | -6.104 | 1.876  |
| 2.098  | -5.685 | 0.123  |
| -7.778 | -3.299 | -0.090 |
| -6.015 | -3.384 | 2.081  |
| -5.513 | -1.748 | -0.088 |
| -3.984 | -3.960 | -0.055 |
| -3.653 | -1.915 | 1.914  |
| -2.050 | -4.209 | 1.990  |

|        |                   |        |
|--------|-------------------|--------|
| -2.024 | -2.048            | -0.199 |
| -0.132 | -3.992            | 0.053  |
| -0.201 | -1.947            | 1.884  |
| 2.051  | -3.566            | 2.052  |
| 1.638  | -1.989            | -0.181 |
| 3.931  | -3.453            | -0.034 |
| -7.935 | -0.563            | 0.043  |
| -5.997 | -0.488            | 2.309  |
| -6.003 | 1.453             | 0.283  |
| -3.542 | 0.219             | 0.185  |
| -4.032 | 1.926             | 2.317  |
| -1.804 | 0.333             | 2.388  |
| -1.710 | 2.338             | 0.456  |
| 3.940  | -0.606            | -0.141 |
| -4.206 | 3.533             | 0.179  |
| 0.326  | 3.875             | -0.674 |
| -3.971 | -3.837            | 3.892  |
| -1.854 | -2.063            | 4.185  |
| -0.007 | -4.036            | 3.772  |
| -3.920 | -0.227            | 4.089  |
| 0.307  | -0.319            | 4.051  |
|        | Al <sub>225</sub> |        |
| -9.867 | -1.957            | 0.001  |
| -9.866 | 0.000             | -1.957 |
| -9.863 | 1.957             | -0.000 |
| -9.863 | 0.001             | 1.957  |
| -5.948 | -5.946            | -0.009 |
| -5.997 | -2.066            | -4.034 |
| -5.997 | -4.034            | -2.066 |
| -7.918 | -2.055            | -2.054 |
| -7.926 | -3.964            | -0.007 |
| -5.935 | -2.009            | -0.008 |
| -5.997 | -4.036            | 2.051  |
| -7.915 | -2.056            | 2.048  |
| -5.989 | -2.066            | 4.020  |
| -5.947 | -0.009            | -5.946 |
| -7.926 | -0.008            | -3.964 |
| -5.997 | 2.050             | -4.037 |
| -5.936 | -0.008            | -2.009 |
| -7.916 | 2.048             | -2.058 |
| -7.795 | -0.001            | -0.002 |
| -5.930 | 1.997             | -0.007 |
| -5.930 | -0.006            | 1.996  |
| -7.914 | 2.054             | 2.052  |

|        |        |        |
|--------|--------|--------|
| -7.916 | -0.005 | 3.955  |
| -5.987 | 2.052  | 4.022  |
| -5.939 | -0.008 | 5.934  |
| -5.989 | 4.020  | -2.069 |
| -7.917 | 3.956  | -0.008 |
| -5.942 | 5.935  | -0.011 |
| -5.987 | 4.024  | 2.051  |
| -1.960 | -9.865 | -0.000 |
| -2.068 | -5.997 | -4.035 |
| -2.057 | -7.918 | -2.056 |
| -4.036 | -5.997 | -2.067 |
| -3.966 | -7.924 | -0.008 |
| -2.010 | -5.935 | -0.008 |
| -2.058 | -7.915 | 2.048  |
| -4.037 | -5.997 | 2.051  |
| -2.067 | -5.990 | 4.020  |
| -2.057 | -2.057 | -7.920 |
| -2.068 | -4.035 | -5.997 |
| -4.035 | -2.067 | -5.996 |
| -4.126 | -4.125 | -4.126 |
| -2.041 | -2.041 | -4.005 |
| -2.041 | -4.006 | -2.041 |
| -4.005 | -2.041 | -2.040 |
| -3.974 | -3.975 | -0.010 |
| -1.997 | -1.999 | -0.012 |
| -2.041 | -4.006 | 2.020  |
| -4.004 | -2.041 | 2.020  |
| -4.130 | -4.130 | 4.111  |
| -2.043 | -2.044 | 3.982  |
| -2.069 | -4.033 | 5.981  |
| -4.032 | -2.069 | 5.981  |
| -2.058 | -2.059 | 7.903  |
| -1.960 | -0.002 | -9.870 |
| -3.966 | -0.009 | -7.926 |
| -2.059 | 2.046  | -7.919 |
| -2.010 | -0.009 | -5.937 |
| -4.037 | 2.050  | -5.998 |
| -3.975 | -0.010 | -3.975 |
| -2.041 | 2.019  | -4.007 |
| -1.998 | -0.013 | -1.999 |
| -4.005 | 2.020  | -2.042 |
| -3.966 | -0.011 | -0.011 |
| -1.997 | 1.977  | -0.013 |
| -1.996 | -0.012 | 1.976  |



|        |        |        |
|--------|--------|--------|
| -4.002 | 2.023  | 2.021  |
| -3.969 | -0.010 | 3.958  |
| -2.037 | 2.022  | 3.982  |
| -2.007 | -0.008 | 5.916  |
| -4.031 | 2.053  | 5.978  |
| -3.961 | -0.006 | 7.912  |
| -2.059 | 2.047  | 7.899  |
| -1.962 | -0.005 | 9.854  |
| -2.068 | 4.019  | -5.992 |
| -4.130 | 4.110  | -4.133 |
| -2.070 | 5.980  | -4.036 |
| -2.043 | 3.983  | -2.045 |
| -4.033 | 5.981  | -2.072 |
| -3.969 | 3.959  | -0.012 |
| -2.008 | 5.917  | -0.011 |
| -2.038 | 3.985  | 2.019  |
| -4.032 | 5.980  | 2.049  |
| -4.125 | 4.111  | 4.109  |
| -2.066 | 5.975  | 4.013  |
| -2.065 | 4.017  | 5.972  |
| -2.059 | 7.903  | -2.063 |
| -3.962 | 7.913  | -0.010 |
| -1.963 | 9.855  | -0.010 |
| -2.060 | 7.901  | 2.043  |
| -0.002 | -9.866 | -1.959 |
| 1.955  | -9.863 | -0.002 |
| -0.002 | -9.863 | 1.956  |
| -0.011 | -5.947 | -5.948 |
| -0.010 | -7.926 | -3.966 |
| 2.049  | -5.998 | -4.038 |
| 2.046  | -7.916 | -2.059 |
| -0.008 | -5.936 | -2.010 |
| -0.002 | -7.796 | -0.002 |
| 1.996  | -5.932 | -0.008 |
| 2.053  | -7.915 | 2.052  |
| -0.006 | -5.931 | 1.996  |
| -0.007 | -7.917 | 3.955  |
| 2.053  | -5.989 | 4.022  |
| -0.008 | -5.941 | 5.934  |
| -0.003 | -1.959 | -9.871 |
| -0.010 | -3.965 | -7.927 |
| 2.045  | -2.059 | -7.920 |
| 2.049  | -4.038 | -5.999 |
| -0.009 | -2.010 | -5.938 |

|        |        |        |
|--------|--------|--------|
| -0.010 | -3.976 | -3.975 |
| 2.019  | -2.043 | -4.007 |
| 2.020  | -4.007 | -2.043 |
| -0.012 | -2.000 | -1.999 |
| -0.010 | -3.968 | -0.011 |
| 1.978  | -1.999 | -0.014 |
| 2.023  | -4.005 | 2.021  |
| -0.010 | -1.999 | 1.976  |
| -0.009 | -3.971 | 3.958  |
| 2.023  | -2.040 | 3.982  |
| 2.053  | -4.033 | 5.977  |
| -0.007 | -2.009 | 5.916  |
| -0.006 | -3.962 | 7.911  |
| 2.048  | -2.060 | 7.899  |
| -0.004 | -1.963 | 9.854  |
| 1.952  | -0.003 | -9.870 |
| -0.004 | 1.953  | -9.869 |
| -0.004 | -0.003 | -7.799 |
| 2.050  | 2.050  | -7.919 |
| 1.995  | -0.008 | -5.935 |
| -0.008 | 1.995  | -5.934 |
| -0.011 | -0.012 | -3.968 |
| 2.021  | 2.020  | -4.006 |
| 1.977  | -0.013 | -2.000 |
| -0.011 | 1.976  | -1.999 |
| -0.011 | -0.013 | -0.013 |
| 1.978  | 1.976  | -0.014 |
| 1.978  | -0.012 | 1.973  |
| -0.009 | 1.977  | 1.974  |
| -0.009 | -0.011 | 3.950  |
| 2.023  | 2.021  | 3.981  |
| 1.995  | -0.008 | 5.913  |
| -0.006 | 1.993  | 5.913  |
| -0.005 | -0.007 | 7.782  |
| 2.049  | 2.047  | 7.894  |
| 1.958  | -0.005 | 9.848  |
| -0.003 | 1.956  | 9.848  |
| -0.009 | 3.953  | -7.923 |
| 2.050  | 4.020  | -5.992 |
| -0.010 | 5.932  | -5.945 |
| -0.011 | 3.958  | -3.973 |
| 2.051  | 5.977  | -4.038 |
| 2.021  | 3.983  | -2.042 |
| -0.008 | 5.917  | -2.012 |

|        |        |        |
|--------|--------|--------|
| -0.009 | 3.952  | -0.013 |
| 1.994  | 5.915  | -0.012 |
| 2.023  | 3.984  | 2.018  |
| -0.007 | 5.916  | 1.990  |
| -0.007 | 3.957  | 3.953  |
| 2.055  | 5.975  | 4.014  |
| 2.055  | 4.019  | 5.970  |
| -0.006 | 5.927  | 5.922  |
| -0.005 | 3.952  | 7.904  |
| -0.007 | 7.911  | -3.966 |
| 2.047  | 7.900  | -2.066 |
| -0.006 | 9.854  | -1.969 |
| -0.006 | 7.783  | -0.011 |
| 1.956  | 9.851  | -0.010 |
| 2.048  | 7.898  | 2.042  |
| -0.004 | 9.851  | 1.951  |
| -0.006 | 7.907  | 3.947  |
| 4.019  | -5.991 | -2.070 |
| 3.955  | -7.919 | -0.009 |
| 5.935  | -5.944 | -0.012 |
| 4.024  | -5.990 | 2.050  |
| 4.018  | -2.069 | -5.993 |
| 4.109  | -4.132 | -4.134 |
| 5.979  | -2.072 | -4.037 |
| 5.980  | -4.035 | -2.073 |
| 3.983  | -2.045 | -2.046 |
| 3.959  | -3.971 | -0.013 |
| 5.918  | -2.010 | -0.012 |
| 5.980  | -4.035 | 2.048  |
| 3.986  | -2.041 | 2.018  |
| 4.112  | -4.127 | 4.108  |
| 5.976  | -2.068 | 4.012  |
| 4.018  | -2.067 | 5.971  |
| 3.952  | -0.009 | -7.923 |
| 5.932  | -0.011 | -5.946 |
| 4.021  | 2.050  | -5.993 |
| 3.958  | -0.012 | -3.974 |
| 5.978  | 2.049  | -4.038 |
| 5.917  | -0.010 | -2.013 |
| 3.984  | 2.020  | -2.042 |
| 3.953  | -0.012 | -0.014 |
| 5.916  | 1.992  | -0.013 |
| 5.917  | -0.009 | 1.989  |
| 3.986  | 2.021  | 2.018  |

|       |        |        |
|-------|--------|--------|
| 3.958 | -0.009 | 3.953  |
| 5.976 | 2.052  | 4.014  |
| 5.928 | -0.008 | 5.922  |
| 4.021 | 2.053  | 5.970  |
| 3.953 | -0.007 | 7.903  |
| 4.109 | 4.107  | -4.131 |
| 5.975 | 4.014  | -2.072 |
| 4.016 | 5.973  | -2.072 |
| 3.958 | 3.956  | -0.013 |
| 5.927 | 5.926  | -0.014 |
| 5.976 | 4.019  | 2.048  |
| 4.021 | 5.974  | 2.048  |
| 4.112 | 4.109  | 4.105  |
| 3.952 | 7.906  | -0.013 |
| 7.904 | -2.061 | -2.064 |
| 7.913 | -3.964 | -0.012 |
| 9.856 | -1.966 | -0.011 |
| 7.902 | -2.063 | 2.041  |
| 7.912 | -0.009 | -3.968 |
| 9.855 | -0.008 | -1.970 |
| 7.901 | 2.044  | -2.066 |
| 7.785 | -0.009 | -0.012 |
| 9.852 | 1.953  | -0.011 |
| 9.852 | -0.007 | 1.949  |
| 7.899 | 2.046  | 2.041  |
| 7.908 | -0.008 | 3.946  |
| 7.907 | 3.949  | -0.014 |
